# Supplementary material
Source: PubMed Central journal article supplement (PMC4959165)
Supplement: AEM.00262-16_zam999117178so1.pdf [file AEM.00262-16_zam999117178so1.pdf]

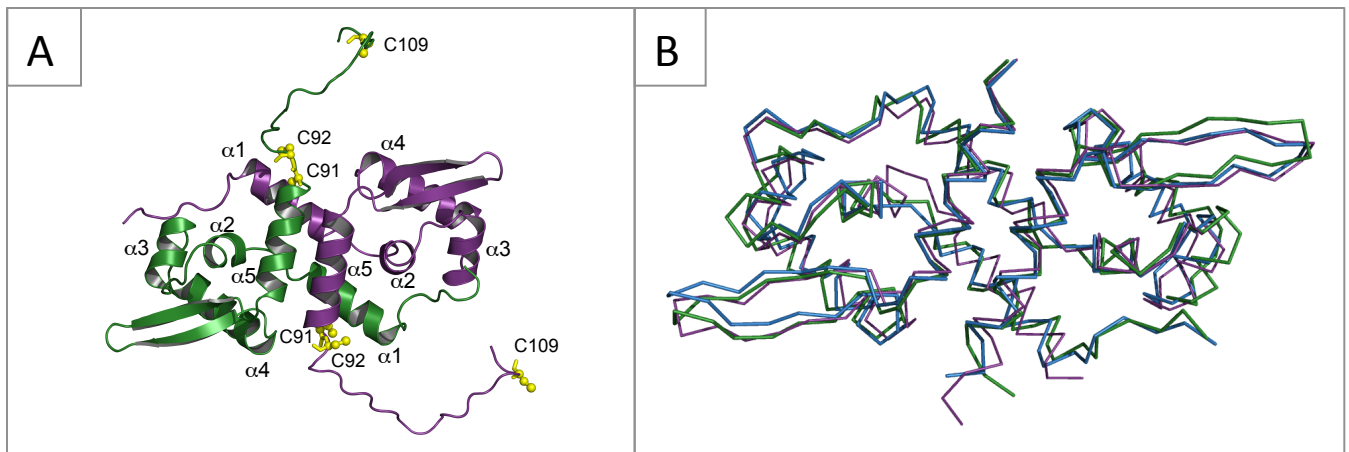

**Figure S1.** Structural modelling of the ArsR proteins. **(A)** A structural model of the ArsRs represented by ArsR3 (Chosen based on the orientation of the C-terminal loop, which did not interfere with the depiction of the core structure). The two chains of the dimer are shown in purple and green and cysteines located at the C-terminal end of  $\alpha 5$  are shown as yellow ball and sticks. **(B)** Superposition of the ArsR structures. ArsR1 and ArsR4 are not differentiable, shown in green ribbon, ArsR2 in purple, ArsR3 in blue.

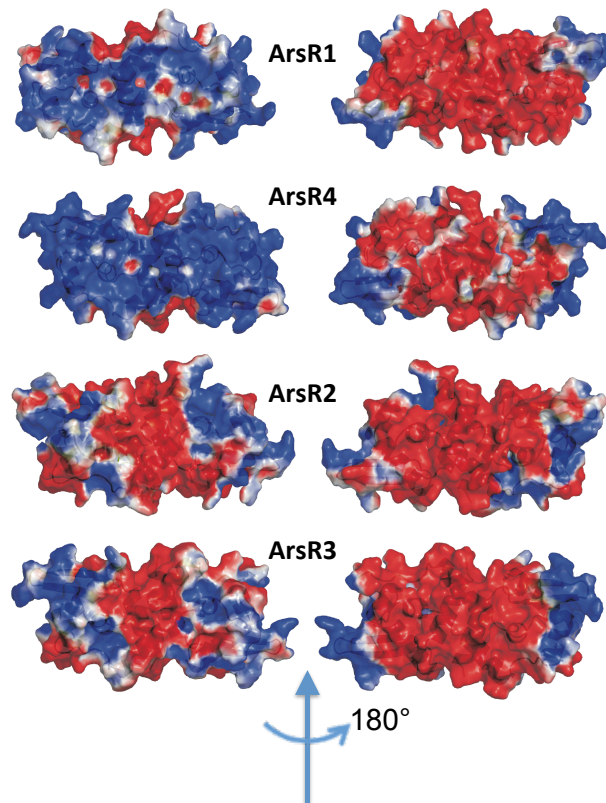

**Figure S2.** Electrostatic surfaces of the ArsR. Red surface denotes predicted negatively charged regions on the protein surface, blue depicts predicted positive charge. Images on right are flipped  $180^\circ$  about a vertical axis on the plane of the paper.
